# Supplementary material
Source: PubMed Central journal article supplement (PMC2763579)
Supplement: NIHMS103785-supplement-1_si_001.pdf [file NIHMS103785-supplement-1_si_001.pdf]

## Supplementary Information for:

### **Inhibition of Heat Shock Induction of Heat Shock Protein 70 and Enhancement of Heat Shock Protein 27 Phosphorylation by Quercetin Derivatives and Analogs**

Rongsheng E. Wang,<sup>†</sup> Jeffrey L.-F. Kao,<sup>†</sup> Carolyn A. Hilliard,<sup>§</sup> Raj K. Pandita,<sup>§</sup> Joseph L.  
Roti Roti,<sup>§</sup> Clayton R. Hunt,<sup>§</sup> John-Stephen Taylor<sup>†</sup> \*

*Department of Chemistry, Washington University, One Brookings Drive, St. Louis, Missouri  
63130 and Radiation Oncology Department, Washington University School of Medicine, St.  
Louis, MO 63108*

\*To whom correspondence should be addressed: Phone: (314) 935-6721, FAX: (314) 935-4481, email:  
taylor@wustl.edu.

|                                                   | Page |
|---------------------------------------------------|------|
| <b>Table S1.</b> Summary of HPLC purity analysis. | S2   |
| <b>Figure S1.</b> HPLC of D1 with Method A.       | S3   |
| <b>Figure S2.</b> HPLC of D1 with Method B.       | S4   |
| <b>Figure S3.</b> HPLC of D5 with Method A.       | S5   |
| <b>Figure S4.</b> HPLC of D5 with Method B.       | S6   |
| <b>Figure S5.</b> HPLC of D8 with Method A.       | S7   |
| <b>Figure S6.</b> HPLC of D8 with Method B.       | S8   |
| <b>Figure S7.</b> HPLC of D9 with Method A.       | S9   |
| <b>Figure S8.</b> HPLC of D9 with Method B.       | S10  |
| <b>Figure S9.</b> HPLC of D10 with Method A.      | S11  |
| <b>Figure S10.</b> HPLC of D10 with Method B.     | S12  |

**Table S1.** Summary of HPLC purity analysis.

| Compd | Method A            |            |                     |            | Method B            |            |                     |            |
|-------|---------------------|------------|---------------------|------------|---------------------|------------|---------------------|------------|
|       | 280 nM              |            | 254 nM              |            | 280 nM              |            | 254 nM              |            |
|       | Retention time /min | Purity / % |
| 1     | 37.6                | 97.7       | 37.6                | 97.7       | 45.1                | 100        | 45.1                | 99.7       |
| 5     | 36.1                | 97.8       | 36.1                | 99.2       | 45.0                | 100        | 45.0                | 100        |
| 8     | 34.4                | 97.8       | 34.3                | 100        | 43.7                | 97.6       | 43.7                | 98.7       |
| 9     | 38.1                | 97.7       | 38.1                | 98.5       | 45.3                | 100        | 45.2                | 100        |
| 10    | 41.4                | 98.7       | 41.4                | 97.7       | 46.6                | 100        | 46.6                | 98.0       |

**Method.** Analytical HPLC purity test was performed in System Gold High Pressure Liquid Chromatography with a solvent pump module 125 and Model 168 diode array UV detector. A Waters XTerra MS C18 (5  $\mu$ m, 6 $\times$ 250 mm) reverse phase column was used with two different solvent systems.

**Gradient:**

20 min, 10% to 30% linear gradient of solvent B in A

10 min, 30% to 50% linear gradient of solvent B in A

10 min, 50% to 100% linear gradient of solvent B in A

15 min, 100% to 10% solvent B.

**Method A:** Solvent A: water with 0.1% trifluoroacetic acid;

Solvent B: 80% acetonitrile/water with 0.1% trifluoroacetic acid.

**Method B:** Solvent A: water with 0.1% trifluoroacetic acid;

Solvent B: 80% methanol/water with 0.1% trifluoroacetic acid

**Figure S1.** HPLC of D1 with Method A.

Data File: D:\VSTlab\Rongsheng Wang\New Folder\w-D1-CD3CN-09152008-final.dat  
 Method: D:\VSTlab\Rongsheng Wang\quercetin-standard-CH3CN.met  
 Acquired: 9/16/2008 11:20:48 PM  
 Printed: 11/08/2008 04:18:44 PM

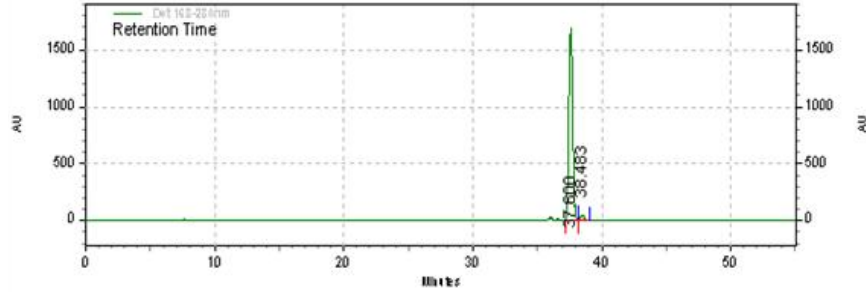

**Det 168-280nm**

**Results**

| Time   | Area     | Area % | Height  | Height % |
|--------|----------|--------|---------|----------|
| 37.600 | 34880738 | 97.67  | 1685260 | 97.41    |
| 38.483 | 830584   | 2.33   | 44723   | 2.59     |

| Totals | Area     | Area % | Height  | Height % |
|--------|----------|--------|---------|----------|
|        | 35711322 | 100.00 | 1729983 | 100.00   |

**Det 168-300nm**

**Results**

| Time   | Area     | Area % | Height  | Height % |
|--------|----------|--------|---------|----------|
| 37.600 | 34581267 | 97.54  | 1678201 | 97.18    |
| 38.483 | 873188   | 2.46   | 48782   | 2.82     |

| Totals | Area     | Area % | Height  | Height % |
|--------|----------|--------|---------|----------|
|        | 35454455 | 100.00 | 1726983 | 100.00   |

**I: 254 nm, 4 nm**

**Results**

| Time   | Area     | Area % | Height  | Height % |
|--------|----------|--------|---------|----------|
| 37.600 | 83064421 | 97.66  | 3426103 | 96.94    |
| 38.467 | 1993365  | 2.34   | 107986  | 3.06     |

| Totals | Area     | Area % | Height  | Height % |
|--------|----------|--------|---------|----------|
|        | 85057786 | 100.00 | 3534089 | 100.00   |

**Figure S2.** HPLC of D1 with Method B.

Data File: D:\UST1ab\Rongsheng Wang\New Folder\w-D1-methanol-4.dat  
 Method: D:\UST1ab\Rongsheng Wang\quercetin-standard-CH3OH.met  
 Acquired: 9/26/2008 11:21:05 PM  
 Printed: 11/08/2008 04:54:57 PM

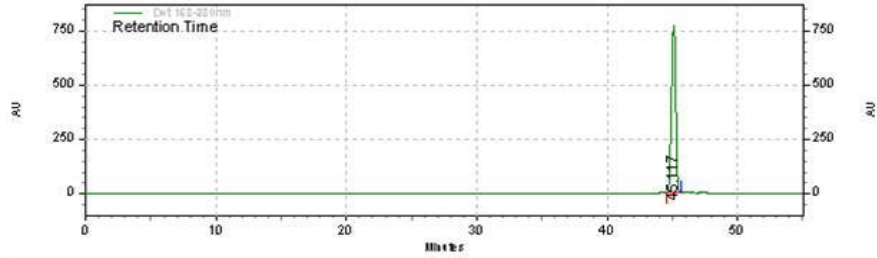

**Det 168-280nm**

**Results**

| Time          | Area            | Area %        | Height        | Height %      |
|---------------|-----------------|---------------|---------------|---------------|
| 45.117        | 17420644        | 100.00        | 766835        | 100.00        |
| <b>Totals</b> | <b>17420644</b> | <b>100.00</b> | <b>766835</b> | <b>100.00</b> |

**Det 168-300nm**

**Results**

| Time          | Area            | Area %        | Height        | Height %      |
|---------------|-----------------|---------------|---------------|---------------|
| 45.117        | 17207074        | 100.00        | 760732        | 100.00        |
| <b>Totals</b> | <b>17207074</b> | <b>100.00</b> | <b>760732</b> | <b>100.00</b> |

**1: 254 nm, 4 nm**

**Results**

| Time          | Area            | Area %        | Height         | Height %      |
|---------------|-----------------|---------------|----------------|---------------|
| 45.100        | 46645546        | 99.73         | 1991252        | 99.68         |
| 45.867        | 126939          | 0.27          | 6395           | 0.32          |
| <b>Totals</b> | <b>46772485</b> | <b>100.00</b> | <b>1997647</b> | <b>100.00</b> |

**Figure S3.** HPLC of D5 with Method A.

Data File: D:\STlab\Rongsheng Wang\New Folder\rw-d5-09212008-CH3CN-2.dat  
 Method: D:\STlab\Rongsheng Wang\quercetin-standard-CH3CN.met  
 Acquired: 9/21/2008 8:11:42 PM  
 Printed: 11/08/2008 03:40:30 PM

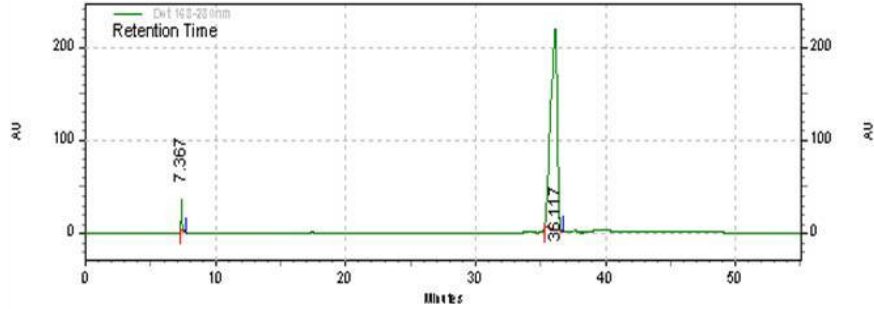

**Det 168-280nm**

**Results**

| Time   | Area    | Area % | Height | Height % |
|--------|---------|--------|--------|----------|
| 7.367  | 174338  | 2.23   | 32706  | 13.20    |
| 36.117 | 7631676 | 97.77  | 215058 | 86.80    |

| Totals | Area    | Area % | Height | Height % |
|--------|---------|--------|--------|----------|
|        | 7806014 | 100.00 | 247764 | 100.00   |

**Det 168-300nm**

**Results**

| Time   | Area    | Area % | Height | Height % |
|--------|---------|--------|--------|----------|
| 7.367  | 60045   | 0.70   | 11541  | 4.64     |
| 36.117 | 8509412 | 99.30  | 236967 | 95.36    |

| Totals | Area    | Area % | Height | Height % |
|--------|---------|--------|--------|----------|
|        | 8569457 | 100.00 | 248508 | 100.00   |

**1: 254 nm, 4 nm**

**Results**

| Time   | Area     | Area % | Height | Height % |
|--------|----------|--------|--------|----------|
| 7.350  | 145976   | 0.78   | 34444  | 6.27     |
| 36.100 | 18501369 | 99.22  | 514843 | 93.73    |

| Totals | Area     | Area % | Height | Height % |
|--------|----------|--------|--------|----------|
|        | 18647345 | 100.00 | 549287 | 100.00   |

**Figure S4.** HPLC of D5 with Method B.

Data File: D:\USTlab\Rongsheng Wang\New Folder\rw-D5-09192008-methanol-3.dat  
 Method: D:\USTlab\Rongsheng Wang\quercetin-standard-CH3OH.met  
 Acquired: 9/20/2008 12:55:54 AM  
 Printed: 11/08/2008 04:50:28 PM

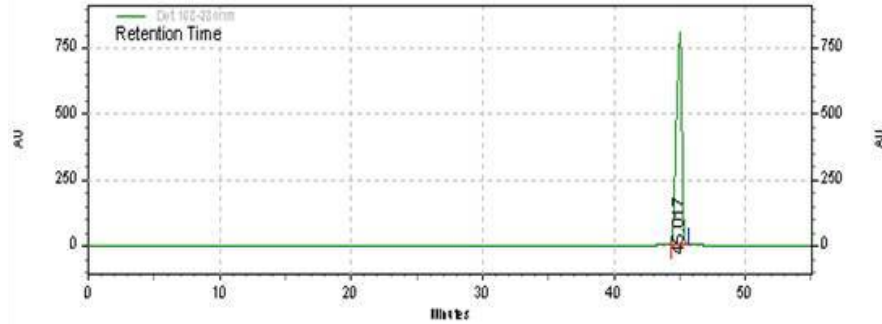

**Det 168-280nm**

**Results**

| Time          | Area            | Area %        | Height        | Height %      |
|---------------|-----------------|---------------|---------------|---------------|
| 45.017        | 23137920        | 100.00        | 800949        | 100.00        |
| <b>Totals</b> | <b>23137920</b> | <b>100.00</b> | <b>800949</b> | <b>100.00</b> |

**Det 168-300nm**

**Results**

| Time          | Area            | Area %        | Height        | Height %      |
|---------------|-----------------|---------------|---------------|---------------|
| 45.017        | 25631179        | 100.00        | 887627        | 100.00        |
| <b>Totals</b> | <b>25631179</b> | <b>100.00</b> | <b>887627</b> | <b>100.00</b> |

**1: 254 nm, 4 nm**

**Results**

| Time          | Area            | Area %        | Height         | Height %      |
|---------------|-----------------|---------------|----------------|---------------|
| 45.017        | 56208640        | 100.00        | 1922426        | 100.00        |
| <b>Totals</b> | <b>56208640</b> | <b>100.00</b> | <b>1922426</b> | <b>100.00</b> |

**Figure S5.** HPLC of D8 with Method A.

Data File: D:\UST1ab\Rongsheng Wang\New Folder\w-ch3cn-D8-09202008-1.dat  
 Method: D:\UST1ab\Rongsheng Wang\quercetin-standard-CH3CN.met  
 Acquired: 9/23/2008 7:25:20 PM  
 Printed: 11/08/2008 04:00:02 PM

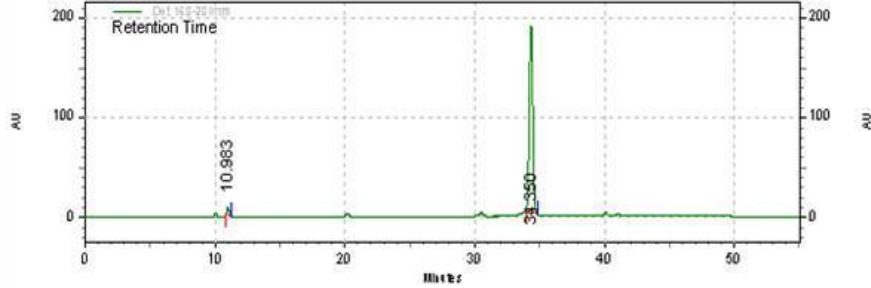

**Det 168-280nm**

**Results**

| Time   | Area    | Area % | Height | Height % |
|--------|---------|--------|--------|----------|
| 10.983 | 79399   | 2.24   | 6633   | 3.45     |
| 34.350 | 3466994 | 97.76  | 185869 | 96.55    |

| Totals | Area    | Area % | Height | Height % |
|--------|---------|--------|--------|----------|
|        | 3546393 | 100.00 | 192502 | 100.00   |

**Det 168-300nm**

**Results**

| Time   | Area    | Area % | Height | Height % |
|--------|---------|--------|--------|----------|
| 34.350 | 3759030 | 100.00 | 200531 | 100.00   |

| Totals | Area    | Area % | Height | Height % |
|--------|---------|--------|--------|----------|
|        | 3759030 | 100.00 | 200531 | 100.00   |

**1: 254 nm, 4 nm**

**Results**

| Time   | Area     | Area % | Height | Height % |
|--------|----------|--------|--------|----------|
| 34.333 | 11221861 | 100.00 | 587384 | 100.00   |

| Totals | Area     | Area % | Height | Height % |
|--------|----------|--------|--------|----------|
|        | 11221861 | 100.00 | 587384 | 100.00   |

**Figure S6.** HPLC of D8 with Method B.

Data File: D:\JSTlab\Rongsheng Wang\New Folder\rw-methanol-D8-09202008-3.dat  
 Method: D:\JSTlab\Rongsheng Wang\quercetin-standard-CH3OH.met  
 Acquired: 9/24/2008 1:00:58 AM  
 Printed: 11/08/2008 04:36:38 PM

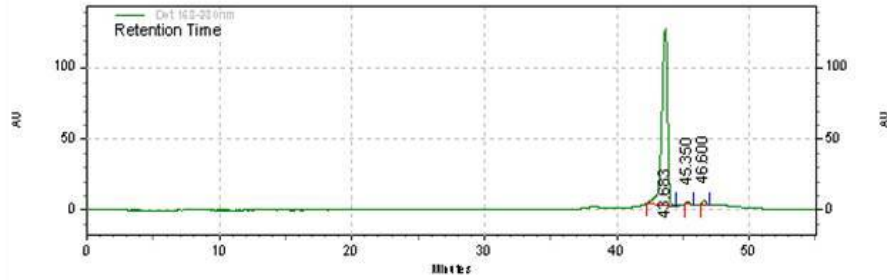

**Det 168-280nm  
Results**

| Time          | Area           | Area %        | Height        | Height %      |
|---------------|----------------|---------------|---------------|---------------|
| 43.683        | 3671148        | 97.61         | 124443        | 96.25         |
| 45.350        | 31659          | 0.84          | 1718          | 1.33          |
| 46.600        | 58075          | 1.54          | 3127          | 2.42          |
| <b>Totals</b> | <b>3760882</b> | <b>100.00</b> | <b>129288</b> | <b>100.00</b> |

**Det 168-300nm  
Results**

| Time          | Area           | Area %        | Height        | Height %      |
|---------------|----------------|---------------|---------------|---------------|
| 43.683        | 3770913        | 97.63         | 129993        | 96.62         |
| 45.367        | 37818          | 0.98          | 1989          | 1.48          |
| 46.600        | 53762          | 1.39          | 2552          | 1.90          |
| <b>Totals</b> | <b>3862493</b> | <b>100.00</b> | <b>134534</b> | <b>100.00</b> |

**I: 254 nm, 4 nm  
Results**

| Time          | Area            | Area %        | Height        | Height %      |
|---------------|-----------------|---------------|---------------|---------------|
| 43.683        | 11127026        | 98.68         | 389242        | 97.93         |
| 46.600        | 148352          | 1.32          | 8216          | 2.07          |
| <b>Totals</b> | <b>11275378</b> | <b>100.00</b> | <b>397458</b> | <b>100.00</b> |



**Figure S7. HPLC of D9 with Method A.**

Data File: D:\JST1ab\Rongsheng Wang\New Folder\w-D9-CH3CN-02.dat  
 Method: D:\JST1ab\Rongsheng Wang\quercetin-standard-CH3CN.met  
 Acquired: 9/26/2008 12:15:59 PM  
 Printed: 11/08/2008 04:06:00 PM

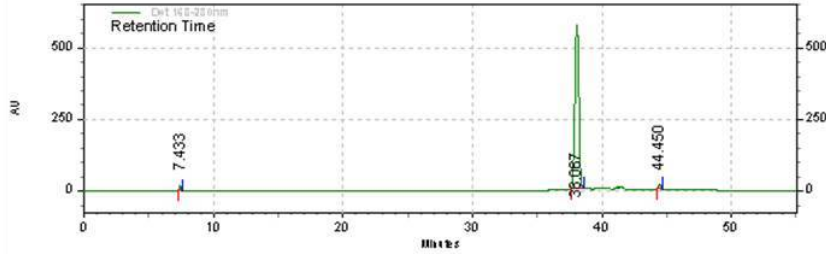

**Det 168-280nm**

**Results**

| Time   | Area     | Area % | Height | Height % |
|--------|----------|--------|--------|----------|
| 7.433  | 96800    | 0.76   | 18563  | 3.08     |
| 38.067 | 12369548 | 97.68  | 570413 | 94.59    |
| 44.450 | 197413   | 1.56   | 14093  | 2.34     |

| Totals | Area     | Area % | Height | Height % |
|--------|----------|--------|--------|----------|
|        | 12663761 | 100.00 | 603069 | 100.00   |

**Det 168-300nm**

**Results**

| Time   | Area     | Area % | Height | Height % |
|--------|----------|--------|--------|----------|
| 38.067 | 10105549 | 98.57  | 465027 | 97.86    |
| 44.450 | 146586   | 1.43   | 10147  | 2.14     |

| Totals | Area     | Area % | Height | Height % |
|--------|----------|--------|--------|----------|
|        | 10252135 | 100.00 | 475174 | 100.00   |

**I: 254 nm, 4 nm**

**Results**

| Time   | Area     | Area % | Height  | Height % |
|--------|----------|--------|---------|----------|
| 7.433  | 95033    | 0.28   | 14604   | 0.92     |
| 38.067 | 33818733 | 98.46  | 1538607 | 97.43    |
| 39.767 | 67046    | 0.20   | 4837    | 0.31     |
| 41.500 | 195551   | 0.57   | 9546    | 0.60     |
| 44.450 | 172942   | 0.50   | 11648   | 0.74     |

| Totals | Area     | Area % | Height  | Height % |
|--------|----------|--------|---------|----------|
|        | 34349305 | 100.00 | 1579242 | 100.00   |

**Figure S8.** HPLC of D9 with Method B.

Data File: D:\USTlab\Rongsheng Wang\New Folder\rw-D9-methanol-final.dat  
 Method: D:\USTlab\Rongsheng Wang\quercetin-standard-CH3OH.met  
 Acquired: 9/24/2008 11:44:24 PM  
 Printed: 11/08/2008 04:40:20 PM

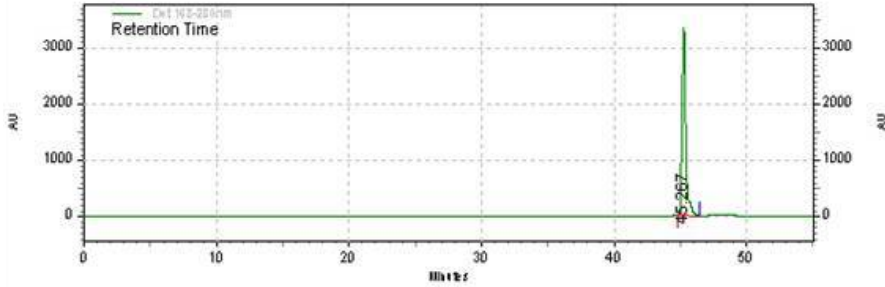

**Det 168-280nm**

**Results**

| Time          | Area            | Area %        | Height         | Height %      |
|---------------|-----------------|---------------|----------------|---------------|
| 45.267        | 65559480        | 100.00        | 3333031        | 100.00        |
| <b>Totals</b> | <b>65559480</b> | <b>100.00</b> | <b>3333031</b> | <b>100.00</b> |

**Det 168-300nm**

**Results**

| Time          | Area            | Area %        | Height         | Height %      |
|---------------|-----------------|---------------|----------------|---------------|
| 45.267        | 48533457        | 100.00        | 2348179        | 100.00        |
| <b>Totals</b> | <b>48533457</b> | <b>100.00</b> | <b>2348179</b> | <b>100.00</b> |

**1: 254 nm, 4 nm**

**Results**

| Time          | Area             | Area %        | Height         | Height %      |
|---------------|------------------|---------------|----------------|---------------|
| 45.200        | 101053255        | 100.00        | 3447419        | 100.00        |
| <b>Totals</b> | <b>101053255</b> | <b>100.00</b> | <b>3447419</b> | <b>100.00</b> |

**Figure S9.** HPLC of D10 with Method A.

Data File: D:\USTlab\Rongsheng Wang\New Folder\w-Derivative10.dat  
 Method: D:\USTlab\Rongsheng Wang\quercetin-standard-CH3CN.met  
 Acquired: 1/4/2008 11:22:56 PM  
 Printed: 11/08/2008 04:11:29 PM

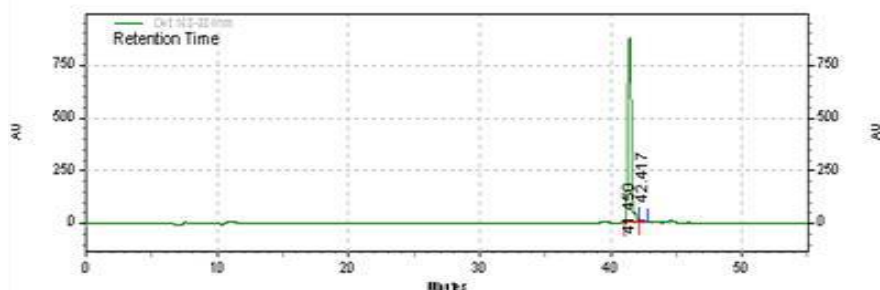

**Det 168-280nm**

**Results**

| Time          | Area            | Area %        | Height        | Height %      |
|---------------|-----------------|---------------|---------------|---------------|
| 41.450        | 16266029        | 98.67         | 875354        | 98.73         |
| 42.417        | 219603          | 1.33          | 11250         | 1.27          |
| <b>Totals</b> | <b>16485632</b> | <b>100.00</b> | <b>886604</b> | <b>100.00</b> |

**Det 168-300nm**

**Results**

| Time          | Area            | Area %        | Height        | Height %      |
|---------------|-----------------|---------------|---------------|---------------|
| 41.450        | 12994252        | 96.79         | 690676        | 96.92         |
| 42.417        | 277567          | 2.07          | 12782         | 1.79          |
| 44.567        | 153380          | 1.14          | 9183          | 1.29          |
| <b>Totals</b> | <b>13425199</b> | <b>100.00</b> | <b>712641</b> | <b>100.00</b> |

**I: 254 nm, 4 nm**

**Results**

| Time          | Area            | Area %        | Height         | Height %      |
|---------------|-----------------|---------------|----------------|---------------|
| 7.517         | 183025          | 0.42          | 10447          | 0.46          |
| 41.450        | 42675826        | 97.66         | 2209512        | 97.70         |
| 42.400        | 707665          | 1.62          | 33157          | 1.47          |
| 44.583        | 134012          | 0.31          | 8461           | 0.37          |
| <b>Totals</b> | <b>43700528</b> | <b>100.00</b> | <b>2261577</b> | <b>100.00</b> |

**Figure S10.** HPLC of D10 with Method B.

Data File: D:\USTlab\Rongsheng Wang\New Folder\w-D10-methanol-4.dat  
 Method: D:\USTlab\Rongsheng Wang\quercetin-standard-CH3OH.met  
 Acquired: 9/26/2008 5:55:19 PM  
 Printed: 11/08/2008 04:46:15 PM

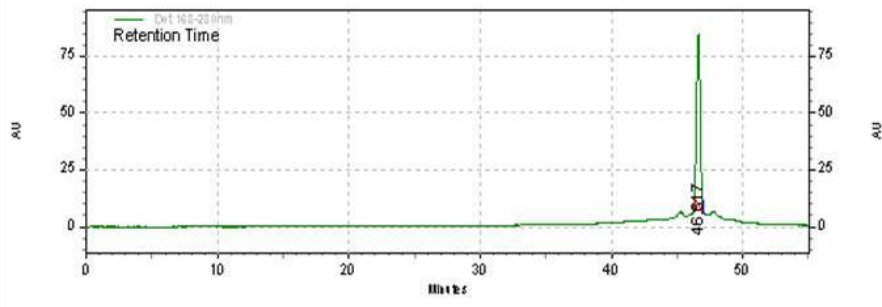

**Det 168-280nm**

**Results**

| Time   | Area    | Area % | Height | Height % |
|--------|---------|--------|--------|----------|
| 46.617 | 1448686 | 100.00 | 75131  | 100.00   |

|        |         |        |       |        |
|--------|---------|--------|-------|--------|
| Totals | 1448686 | 100.00 | 75131 | 100.00 |
|--------|---------|--------|-------|--------|

**Det 168-300nm**

**Results**

| Time   | Area    | Area % | Height | Height % |
|--------|---------|--------|--------|----------|
| 46.617 | 1005033 | 100.00 | 54235  | 100.00   |

|        |         |        |       |        |
|--------|---------|--------|-------|--------|
| Totals | 1005033 | 100.00 | 54235 | 100.00 |
|--------|---------|--------|-------|--------|

**1: 254 nm, 4 nm**

**Results**

| Time   | Area    | Area % | Height | Height % |
|--------|---------|--------|--------|----------|
| 45.317 | 91422   | 1.96   | 4538   | 2.04     |
| 46.617 | 4576383 | 98.04  | 218035 | 97.96    |

|        |         |        |        |        |
|--------|---------|--------|--------|--------|
| Totals | 4667805 | 100.00 | 222573 | 100.00 |
|--------|---------|--------|--------|--------|
